# Supplementary material
Source: MDPI journal article supplement (https://www.mdpi.com/2073-4395/10/2/265)
Supplement: s1 [file s1]

## APPENDIX A: Preparation, film-forming property and antifungal activity of 28.6% chitosan composite film (CCF)

The CCF was prepared by the following steps.

(1) The film-forming effects of different concentrations of chitosan and dextrin were shown in Table S1. The better film-forming concentrations of chitosan were 6.00, 8.00, 10.00% and dextrin were 10.00, 20.00 and 30.00%.

Table S1. The film-forming effects of different concentrations of chitosan and dextrin

| Film materials | Concentration (%) | Ductility | Degree of wire drawing | Extended area (cm <sup>2</sup> ) | Dilution property |
|----------------|-------------------|-----------|------------------------|----------------------------------|-------------------|
| Water          | 0.00              | 0         | 0                      | 1.32                             | --                |
|                | 2.00              | +         | +                      | 1.04                             | Easy              |
|                | 4.00              | ++        | +                      | 1.19                             | Easy              |
|                | 6.00              | +++       | ++                     | 1.36                             | Easy              |
|                | 8.00              | ++++      | +++                    | 1.45                             | Easy              |
|                | 10.00             | ++++      | +++                    | 1.40                             | Easy              |
|                | 12.00             | ++++      | +++                    | 1.20                             | Difficult         |
| Chitosan       | 10.00             | +         | +                      | 1.18                             | Easy              |
|                | 20.00             | ++        | +                      | 1.27                             | Easy              |
|                | 30.00             | ++        | ++                     | 1.30                             | Easy              |
|                | 40.00             | ++        | ++                     | 1.52                             | Difficult         |
|                | 50.00             | +++       | +++                    | 1.90                             | Difficult         |
|                | 60.00             | +++       | +++                    | 1.70                             | More difficult    |
|                |                   |           |                        |                                  |                   |
| Dextrin        |                   |           |                        |                                  |                   |
|                |                   |           |                        |                                  |                   |
|                |                   |           |                        |                                  |                   |
|                |                   |           |                        |                                  |                   |
|                |                   |           |                        |                                  |                   |

(2) The film-forming effects of different mixture ratios of chitosan-dextrin were shown in Table S2. The 8:10 and 6:20 of chitosan: dextrin had very good film-forming effects.

Table S2. The film-forming effects of different mixture ratios of chitosan-dextrin

| Chitosan : Dextrin (%) | Ductility | Degree of wire drawing | Extended area (cm <sup>2</sup> ) | Dilution property |
|------------------------|-----------|------------------------|----------------------------------|-------------------|
| 0.00                   | 0         | 0                      | 1.13                             | --                |
| 4:10                   | ++        | ++                     | 1.26                             | Easy              |
| 6:10                   | ++++      | +++                    | 1.33                             | Easy              |
| 8:10                   | ++++      | +++                    | 1.47                             | Easy              |

|      |      |     |      |           |
|------|------|-----|------|-----------|
| 4:20 | ++++ | +++ | 1.29 | Easy      |
| 6:20 | ++++ | +++ | 1.49 | Easy      |
| 8:20 | ++++ | +++ | 1.58 | Difficult |
| 4:30 | ++++ | +++ | 1.20 | Easy      |
| 6:30 | ++++ | +++ | 1.53 | Difficult |
| 8:30 | ++++ | +++ | 1.43 | Difficult |

(3) The inhibition of chitosan and dextrin to *B. dothidea* and *Phomopsis* sp. were shown in Table S3, two materials had certain antibacterial properties, and chitosan was better than dextrin. The inhibition of different mixture ratios of chitosan-dextrin to *B. dothidea* and *Phomopsis* sp. were shown in Table S4 and Table S5, respectively. Among all the tested mixture ratios, the 8:10 of chitosan: dextrin caused the inhibition of mycelia growth in both *B. dothidea* and *Phomopsis* sp. with mycelial EC<sub>50</sub> values of 430.00 mg L<sup>-1</sup> and 252.32 mg L<sup>-1</sup>, respectively.

Table S3. The inhibition of two film materials to *B. dothidea* and *Phomopsis* sp.

| Fungal isolates      | Materials | Toxic regression equation | Correlation coefficient (r) | EC <sub>50</sub> (mg L <sup>-1</sup> ) | 95% confidence region (mg L <sup>-1</sup> ) |
|----------------------|-----------|---------------------------|-----------------------------|----------------------------------------|---------------------------------------------|
| <i>B. dothidea</i>   | Chitosan  | y=5.1568+0.7069x          | 0.9941                      | 600.11                                 | 531.59~677.42                               |
|                      | Dextrin   | y=4.6559+1.0906x          | 0.9988                      | 2067.57                                | 1881.53~2272.20                             |
| <i>Phomopsis</i> sp. | Chitosan  | y=5.2904+0.9250x          | 0.9865                      | 485.41                                 | 402.14~585.77                               |
|                      | Dextrin   | y=5.1848+0.7280x          | 0.9937                      | 557.28                                 | 491.20~632.31                               |

Table S4. The inhibition of different mixture ratios of chitosan-dextrin to *B. dothidea*

| Chitosan : Dextrin(%) | Toxic regression equation | Correlation coefficient(r) | EC <sub>50</sub> (mg L <sup>-1</sup> ) | 95% confidence region(mg L <sup>-1</sup> ) |
|-----------------------|---------------------------|----------------------------|----------------------------------------|--------------------------------------------|
| 4:10                  | y=5.0975+0.8514x          | 0.9778                     | 768.21                                 | 564.00~1046.41                             |
| 6:10                  | y=5.1424+0.9929x          | 0.9927                     | 718.80                                 | 614.22~841.29                              |
| 8:10                  | y=5.3454+0.9423x          | 0.9919                     | 430.00                                 | 373.21~495.50                              |
| 4:20                  | y=4.5466+0.4442x          | 0.9878                     | 10484.21                               | 6279.01~17505.49                           |
| 6:20                  | y=4.5961+0.6476x          | 0.9937                     | 4205.10                                | 3215.18~550.00                             |
| 8:20                  | y=4.8280+0.8139x          | 0.9564                     | 1626.69                                | 777.89~3401.71                             |
| 4:30                  | y=4.2623+0.6724x          | 0.9677                     | 12506.69                               | 5548.45~28191.00                           |
| 6:30                  | y=4.2844+0.9365x          | 0.9860                     | 5809.41                                | 3844.78~8.7778.11                          |
| 8:30                  | y=4.6391+0.5601x          | 0.9838                     | 4409.62                                | 3001.89~6477.56                            |

Table S5. The inhibition of different mixture ratios of chitosan-dextrin to *Phomopsis* sp.

| Chitosan : Dextrin(%) | Toxic regression equation | Correlation coefficient(r) | EC <sub>50</sub> (mg L <sup>-1</sup> ) | 95% confidence region(mg L <sup>-1</sup> ) |
|-----------------------|---------------------------|----------------------------|----------------------------------------|--------------------------------------------|
|-----------------------|---------------------------|----------------------------|----------------------------------------|--------------------------------------------|

|      |                    |        |         |                 |
|------|--------------------|--------|---------|-----------------|
| 4:10 | $y=5.4524+1.0449x$ | 0.9985 | 369.00  | 347.11~392.33   |
| 6:10 | $y=5.8436+1.4341x$ | 0.9888 | 258.11  | 214.82~310.14   |
| 8:10 | $y=5.9211+1.5398x$ | 0.9912 | 252.32  | 215.78~294.84   |
| 4:20 | $y=5.0372+1.3531x$ | 0.9965 | 938.61  | 855.78~1029.45  |
| 6:20 | $y=5.0286+0.6983x$ | 0.9821 | 910.10  | 722.11~1147.00  |
| 8:20 | $y=5.0682+0.7275x$ | 0.9885 | 805.83  | 634.33~1023.78  |
| 4:30 | $y=4.6309+0.7253x$ | 0.9981 | 3228.44 | 2848.81~3658.45 |
| 6:30 | $y=4.5874+0.8322x$ | 0.9941 | 3131.62 | 2572.89~3811.56 |
| 8:30 | $y=4.6747+0.6812x$ | 0.9882 | 3002.71 | 2268.11~3975.35 |

(4) Firstly, we screened different antifungal substances, among which ferulic acid and natamycinpy had better inhibitory effect to pathogenic fungal (as shown in Table S6, S7). Then, we added them to 8:10 of chitosan composite film to test their inhibitory effect on pathogenic fungal (As shown in Table S8). Finally, considering the cost and safety, we selected ferulic acid as the synergistic substance of 8:10 of chitosan composite film, because it came from plants and was safe.

Table S6. The inhibition of different antifungal materials to *B. dothidea*

| Antifungal materials | Toxic regression equation | Correlation coefficient(r) | EC <sub>50</sub> (mg L <sup>-1</sup> ) | 95% confidence region (mg L <sup>-1</sup> ) |
|----------------------|---------------------------|----------------------------|----------------------------------------|---------------------------------------------|
| Natamycinpty         | $y=7.5976+1.6267x$        | 0.9838                     | 20.71                                  | 20.77~31.00                                 |
| Ferulic acid         | $y=11.0033+4.5315x$       | 0.9881                     | 47.32                                  | 31.22~71.78                                 |
| Antifungal peptide   | $y=6.0308+1.0580x$        | 0.9809                     | 106.13                                 | 85.12~132.33                                |
| Lysozyme             | $y=5.4778+1.2953x$        | 0.9938                     | 427.74                                 | 377.22~485.00                               |
| Glycine              | $y=5.2978+1.0409x$        | 0.9952                     | 517.42                                 | 463.89~577.11                               |
| Tea polyphenols      | $y=5.1876+0.7540x$        | 0.9724                     | 563.89                                 | 328.56~967.66                               |
| Citric acid          |                           | less effective             |                                        |                                             |

Table S7. The inhibition of different antifungal materials to *Phomopsis* sp.

| Antifungall materials | Toxic regression equation | Correlation coefficient(r) | EC <sub>50</sub> (mg L <sup>-1</sup> ) | 95% confidence region (mg L <sup>-1</sup> ) |
|-----------------------|---------------------------|----------------------------|----------------------------------------|---------------------------------------------|
| Natamycinpty          | $y=7.2311+1.3893x$        | 0.9960                     | 24.80                                  | 22.44~27.38                                 |
| Ferulic acid          | $y=6.8553+1.1438x$        | 0.9702                     | 23.91                                  | 14.56~39.00                                 |
| Antifungal peptide    | $y=5.7350+0.9670x$        | 0.9979                     | 173.83                                 | 160.11~188.56                               |
| Lysozyme              | $y=6.0452+0.8915x$        | 0.9833                     | 67.22                                  | 53.00~85.22                                 |
| Glycine               | $y=5.4886+0.8915x$        | 0.9833                     | 283.00                                 | 223.13~358.18                               |
| Tea polyphenols       |                           | less effective             |                                        |                                             |
| Citric acid           |                           | less effective             |                                        |                                             |

Table S8. The inhibition of two 19% film (Natamycinpty or Ferulic acid+8:10) to *B. dothidea* and *Phomopsis* sp.

| Fungal isolates      | Antimicrobial materials | Toxic regression equation | Correlation coefficient(r) | EC <sub>50</sub> (mg L <sup>-1</sup> ) | 95% confidence region (mg L <sup>-1</sup> ) |
|----------------------|-------------------------|---------------------------|----------------------------|----------------------------------------|---------------------------------------------|
| <i>B. dothidea</i>   | Natamycinpty            | y=9.4433+5.8405x          | 0.9969                     | 173.52                                 | 110.82~278.23                               |
|                      | Ferulic acid            | y=6.0232+0.9754x          | 0.9775                     | 89.31                                  | 68.93~115.67                                |
| <i>Phomopsis</i> sp. | Natamycinpty            | y=6.0452+0.8915x          | 0.9833                     | 67.20                                  | 53.00~85.22                                 |
|                      | Ferulic acid            | y=5.9994+0.9202x          | 0.9942                     | 82.00                                  | 72.30~93.12                                 |

(5) We added calcium nitrate to the 19% chitosan composite film to test their inhibitory effect on pathogenic fungal (As shown in Table S9), 24% chitosan composite film caused the inhibition of mycelia growth in both *B. dothidea* and *Phomopsis* sp. with mycelial EC<sub>50</sub> values of 69.00 mg L<sup>-1</sup> and 50.41 mg L<sup>-1</sup>, respectively.

Table S9. The inhibition of two different film to *B. dothidea* and *Phomopsis* sp.

| Fungal isolates      | Films          | Toxic regression equation | Correlatin coefficient(r) | EC <sub>50</sub> (mg L <sup>-1</sup> ) | 95% confidence region(mg L <sup>-1</sup> ) |
|----------------------|----------------|---------------------------|---------------------------|----------------------------------------|--------------------------------------------|
| <i>B. dothidea</i>   | 24% (8:10+1+5) | y=6.0227+0.8807x          | 0.9995                    | 69.00                                  | 66.56~71.5                                 |
|                      | 19% (8:10+1)   | y=6.2927+1.2456x          | 0.9768                    | 91.71                                  | 70.13~119.89                               |
|                      | 18% (8:10)     | y=5.1920+0.8183x          | 0.9954                    | 582.62                                 | 521.78~650.45                              |
| <i>Phomopsis</i> sp. | 24% (8:10+1+5) | y=5.8745+0.6742x          | 0.9880                    | 50.41                                  | 42.33~60.12                                |
|                      | 19% (8:10+1)   | y=6.3408+1.1184x          | 0.9938                    | 63.32                                  | 55.56~72.00                                |
|                      | 18% (8:10)     | y=5.4207+0.9403x          | 0.9872                    | 356.90                                 | 296.78~429.34                              |

Note: 24% (8% chitosan +10% dextrin +1% ferulic acid +5% calcium nitrate); 19% (8% chitosan +10% dextrin +1% ferulic acid); 18% (8% chitosan +10% dextrin).

(6) For the selection of auxiliaries, we screened out 3% glycerol, 1% organosilicon and 0.6% sodium benzoate with better results (as shown in Table S10, S11, S12). The 28.6% CCF (8% chitosan +10% dextrin +1% ferulic acid +5% calcium nitrate+5% glycerol+1% organosilicon+0.6% sodium benzoate) was finally prepared.

Table S10. The film-forming effects of different content glycol and glycerol to chitosan-dextrin film

| Added concentration (%)                                                    |        |          | Cold storage effect                                                  | Film-forming effects                |
|----------------------------------------------------------------------------|--------|----------|----------------------------------------------------------------------|-------------------------------------|
| Film                                                                       | Glycol | Glycerol |                                                                      |                                     |
| 24% CCF<br>(8% chitosan +10% dextrin +1% ferulic acid +5% calcium nitrate) | 1      | -        | Ivory, coagulated, unqualified                                       | Bubbles increased and larger        |
|                                                                            | 2      | -        | Ivory, semi coagulated, unqualified                                  | Viscosity and the bubbles increased |
|                                                                            | 3      | -        | Ivory, gelatinous, restored at room temperature, basically qualified | Viscosity and the bubbles increased |
|                                                                            | -      | 1        | Ivory, gelatinous, restored at room temperature, basically qualified | No bubbles                          |

|   |   |                                    |                                    |
|---|---|------------------------------------|------------------------------------|
| - | 2 | Ivory, colloidal liquid, qualified | No bubbles                         |
| - | 3 | Ivory, colloidal liquid, qualified | Viscosity increased and no bubbles |

Table S11. The film-forming effects of different content organosilicon to chitosan-dextrin film

| Added concentration (%)                                                     |               | Film-forming effects          |
|-----------------------------------------------------------------------------|---------------|-------------------------------|
| Film                                                                        | Organosilicon |                               |
| 27% CCF                                                                     | 0.5           | Similar to control            |
| (8% chitosan +10% dextrin +1% ferulic acid +5% calcium nitrate+3% glycerol) | 1.0           | Ductility increased           |
|                                                                             | 1.5           | Viscosity decreased           |
|                                                                             | 2.0           | Viscosity obviously decreased |

Table S12. The storage period of different content sodium benzoate and salicylic acid to chitosan-dextrin film

| Added concentration                                                                          |                 |                | Storage quality                                     |
|----------------------------------------------------------------------------------------------|-----------------|----------------|-----------------------------------------------------|
| Film                                                                                         | Sodium benzoate | Salicylic acid |                                                     |
| 28% CCF                                                                                      | 0.2             | -              | No fungal growth, slight change in smell after 60 d |
| (8% chitosan +10% dextrin +1% ferulic acid +5% calcium nitrate+5% glycerol+1% organosilicon) | 0.4             | -              | No fungal growth, slight change in smell after 60 d |
|                                                                                              | 0.6             | -              | No fungal growth, no change in smell after 60 d     |
|                                                                                              | 0.8             | -              | No fungal growth, no change in smell after 60 d     |
|                                                                                              | -               | 0.2            | No fungal growth, slight change in smell after 60 d |
| organosilicon)                                                                               | -               | 0.4            | No fungal growth, slight change in smell after 60 d |
|                                                                                              | -               | 0.6            | No fungal growth, slight change in smell after 60 d |
|                                                                                              | -               | 0.8            | No fungal growth, no change in smell after 60 d     |
|                                                                                              | CK              |                | Fungal growth, change in smell after 60 d           |

(7) In summary, through the selection of auxiliaries and the addition of calcium nitrate, the 28.6% CCF was finally prepared. The effects of CCFs on the mycelial growth of pathogenic fungi are shown in Table S13. 28.6% CCF had strong inhibitory effect to mycelia growth of *B. dothidea* and *Phomopsis* sp. with mycelial EC<sub>50</sub> values of 68.11 mg L<sup>-1</sup> and 50.34 mg L<sup>-1</sup>, respectively.

Table S13. The inhibition of different CCFs to mycelial growth of *Botryosphaeria dothidea* and *Phomopsis* sp.

| Fungal isolates      | Tested pharmacy | Toxic regression equation | Correlatin coefficient(r) | EC <sub>50</sub> (mg L <sup>-1</sup> ) | 95% confidence region (mg L <sup>-1</sup> ) |
|----------------------|-----------------|---------------------------|---------------------------|----------------------------------------|---------------------------------------------|
| <i>B. dothidea</i>   | 28.6% CCF       | y=6.0206+0.8746x          | 0.9990                    | 68.11                                  | 64.67~71.56                                 |
|                      | 24% CCF         | y=6.0213+0.8795x          | 0.9993                    | 69.00                                  | 65.78~72.32                                 |
|                      | 19% CCF         | y=6.3511+1.2645x          | 0.9901                    | 85.40                                  | 72.20~101.00                                |
|                      | 18% CCF         | y=5.1942+0.8207x          | 0.9960                    | 579.89                                 | 523.14~643.00                               |
| <i>Phomopsis</i> sp. | 28.6% CCF       | y=5.8783+0.6764x          | 0.9878                    | 50.34                                  | 42.13~60.10                                 |
|                      | 24% CCF         | y=5.7794+0.6363x          | 0.9913                    | 59.52                                  | 50.67~69.89                                 |
|                      | 19% CCF         | y=5.9323+1.1281x          | 0.9949                    | 149.11                                 | 127.78~174.13                               |
|                      | 18% CCF         | y=5.4267+0.9425x          | 0.9882                    | 352.45                                 | 295.24~421.00                               |
